# Supplementary material for: Lactose Residual Content in PDO Cheeses: Novel Inclusions for Consumers with Lactose Intolerance
Source: MDPI journal article supplement (doi:10.3390/foods10092236), 2021-09-21
Supplement: s1 [file s1]

## Questionnaire administrared to professionals of nutrition

| Question                                                                               | Answers                                                 |
|----------------------------------------------------------------------------------------|---------------------------------------------------------|
| What is your occupation?                                                               | Nutritionist                                            |
|                                                                                        | Dietician                                               |
|                                                                                        | Medical doctor specialized in nutrition                 |
| How long have you been exercising your professional activity?                          | 0-3 years                                               |
|                                                                                        | 4-10 years                                              |
|                                                                                        | More than 10 years                                      |
| Which are the Italian regions you work in?                                             | Abruzzo                                                 |
|                                                                                        | Basilicata                                              |
|                                                                                        | Calabria                                                |
|                                                                                        | Campania                                                |
|                                                                                        | Emilia Romagna                                          |
|                                                                                        | Friuli-Venezia Giulia                                   |
|                                                                                        | Lazio                                                   |
|                                                                                        | Liguria                                                 |
|                                                                                        | Lombardia                                               |
|                                                                                        | Marche                                                  |
|                                                                                        | Molise                                                  |
|                                                                                        | Piemonte                                                |
|                                                                                        | Puglia                                                  |
|                                                                                        | Sardegna                                                |
|                                                                                        | Sicilia                                                 |
|                                                                                        | Toscana                                                 |
|                                                                                        | Trentino-Alto Adige                                     |
|                                                                                        | Umbria                                                  |
|                                                                                        | Valle d'Aosta                                           |
|                                                                                        | Veneto                                                  |
| How many are your patients in total?<br>Indicate the numer in the year 2019.           | Less than 50                                            |
|                                                                                        | 51-100                                                  |
|                                                                                        | 101-200                                                 |
|                                                                                        | More than 200                                           |
| How many are your lactose-intolerant patients?<br>Indicate the numer in the year 2019. | Less than 25                                            |
|                                                                                        | 26-50                                                   |
|                                                                                        | 51-100                                                  |
|                                                                                        | More than 100                                           |
| What is your knoledge about lactose intolerance topic?                                 | Scarce                                                  |
|                                                                                        | Sufficient                                              |
|                                                                                        | Good                                                    |
|                                                                                        | Excellent, acquired thaks to certified training courses |

|                                                                                                                                                     |                                                               |
|-----------------------------------------------------------------------------------------------------------------------------------------------------|---------------------------------------------------------------|
| Which test did your lactose intolerant patients are mainly diagnosed by when you first visited them?                                                | H2 Lactose Breath test                                        |
|                                                                                                                                                     | LCT C/T-13910 Genetic test                                    |
|                                                                                                                                                     | Both above-mentioned tests                                    |
|                                                                                                                                                     | Auto-diagnosis                                                |
|                                                                                                                                                     | Not-validated tests (e.g. Vega-Test, Cito-Test)               |
| How much clarity do you think there is about the topic "lactose intolerance and naturally lactose-free cheeses"?                                    | Scarce                                                        |
|                                                                                                                                                     | Sufficient                                                    |
|                                                                                                                                                     | Good                                                          |
|                                                                                                                                                     | Excellent                                                     |
| Which are the naturally lactose-free PDO cheese that you advise to your lactose intolerant patients the most?<br>Choose a maximum of three options. | Grana Padano and Parmigiano Reggiano long-aged (30-36 months) |
|                                                                                                                                                     | Grana padano and Parmigiano Reggiano (any ageing)             |
|                                                                                                                                                     | Gorgonzola                                                    |
|                                                                                                                                                     | Emmentaler                                                    |
|                                                                                                                                                     | Pecorino                                                      |
| Do you think the nowadays labeling policy for naturally lactose-free PDO cheeses to be satisfying?                                                  | Fontina                                                       |
|                                                                                                                                                     | Scarce                                                        |
|                                                                                                                                                     | Sufficient                                                    |
| Do you think a table of naturally lactose-free cheeses would be useful to distribute to your lactose intolerant patients?                           | Good                                                          |
|                                                                                                                                                     | Not at all                                                    |
|                                                                                                                                                     | Yes, but I wouldn't use it                                    |
|                                                                                                                                                     | Yes, it could be useful                                       |
| Do you know about the Italian lactose-intolerant patients' association, AILI (Associazione Italiana Latto-Intolleranti)?                            | Yes, it is necessary                                          |
|                                                                                                                                                     | No                                                            |
|                                                                                                                                                     | I have heard of it                                            |
| How did you learn about the Association?                                                                                                            | Yes                                                           |
|                                                                                                                                                     | Personal research on Google                                   |
|                                                                                                                                                     | Event (stands, trade fairs, conventionals)                    |
|                                                                                                                                                     | Social media (Facebook, Instagram)                            |
|                                                                                                                                                     | Word-of-mouth                                                 |
