# Supplementary material for: Lactose Residual Content in PDO Cheeses: Novel Inclusions for Consumers with Lactose Intolerance
Source: MDPI journal article supplement (doi:10.3390/foods10092236), 2021-09-21
Supplement: s1 [file s1]

## Questionnaire administrated to lactose intolerant consumers

| Question                                            | Answers                                                 |
|-----------------------------------------------------|---------------------------------------------------------|
| Are you lactose intolerant?                         | Yes                                                     |
|                                                     | I am a parent or guardian of a lactose intolerant minor |
|                                                     | No                                                      |
| How did you find out you are lactose intolerant?    | Diagnosed by breath test and/or specific genetic test   |
|                                                     | Auto-diagnosis                                          |
|                                                     | Not-validated tests (e.g. Vega-Test, Cito-Test)         |
| How long have you known you are lactose intolerant? | Since birth                                             |
|                                                     | Less than 1 year                                        |
|                                                     | 1-3 years                                               |
|                                                     | More than 3 years                                       |
| What is your gender?                                | Male                                                    |
|                                                     | Female                                                  |
| What is your age?                                   | Less than 18 years                                      |
|                                                     | 18-24 years                                             |
|                                                     | 25-34 years                                             |
|                                                     | 35-44 years                                             |
|                                                     | 45-54 years                                             |
|                                                     | More than 55 years                                      |
| What is the Italian region you live in?             | Abruzzo                                                 |
|                                                     | Basilicata                                              |
|                                                     | Calabria                                                |
|                                                     | Campania                                                |
|                                                     | Emilia Romagna                                          |
|                                                     | Friuli-Venezia Giulia                                   |
|                                                     | Lazio                                                   |
|                                                     | Liguria                                                 |
|                                                     | Lombardia                                               |
|                                                     | Marche                                                  |
|                                                     | Molise                                                  |
|                                                     | Piemonte                                                |
|                                                     | Puglia                                                  |
|                                                     | Sardegna                                                |
|                                                     | Sicilia                                                 |
|                                                     | Toscana                                                 |
|                                                     | Trentino-Alto Adige                                     |
|                                                     | Umbria                                                  |
|                                                     | Valle d'Aosta                                           |
|                                                     | Veneto                                                  |

|                                                                                                              |                                                               |
|--------------------------------------------------------------------------------------------------------------|---------------------------------------------------------------|
| What is your occupation?                                                                                     | Employee                                                      |
|                                                                                                              | Student                                                       |
|                                                                                                              | Non-resident student                                          |
|                                                                                                              | Stay-at-home                                                  |
|                                                                                                              | Retired                                                       |
| Do you consume naturally lactose-free cheeses and/or "delactosed" cheeses?                                   | Yes, both                                                     |
|                                                                                                              | Yes, only naturally lactose-free cheeses                      |
|                                                                                                              | Yes, only "delactosed" cheeses                                |
|                                                                                                              | Rarely                                                        |
|                                                                                                              | Never                                                         |
| Which are the PDO cheeses that you buy the most?<br>Choose a maximum of three options.                       | Grana Padano and Parmigiano Reggiano long-aged (30-36 months) |
|                                                                                                              | Grana Padano and Parmigiano Reggiano (any ageing)             |
|                                                                                                              | Gorgonzola                                                    |
|                                                                                                              | Emmentaler                                                    |
|                                                                                                              | Pecorino                                                      |
|                                                                                                              | Fontina                                                       |
| What is your knowledge about the difference between naturally lactose-free cheeses and "delactosed" cheeses? | Scarce                                                        |
|                                                                                                              | Sufficient                                                    |
|                                                                                                              | Good                                                          |
|                                                                                                              | Excellent                                                     |
| How often do you understand if PDO cheese is naturally lactose-free from its label?                          | Rarely                                                        |
|                                                                                                              | Sometimes                                                     |
|                                                                                                              | Always                                                        |
| Do you think a list of naturally lactose-free cheeses would be useful to consult?                            | Not at all                                                    |
|                                                                                                              | Yes, but I wouldn't use it                                    |
|                                                                                                              | Yes, it could be useful                                       |
|                                                                                                              | Yes, it is necessary                                          |
